# Supplementary material
Source: PubMed Central journal article supplement (PMC3762676)
Supplement: NIHMS507646-supplement-Supp_Table_1.pdf [file NIHMS507646-supplement-Supp_Table_1.pdf]

## Pan SPEM

| Probe     | Direction  | DMP777 | <i>H.felis</i> | L635  | WT_CC | Gene Symbol   | Fold Change   |                      |            |
|-----------|------------|--------|----------------|-------|-------|---------------|---------------|----------------------|------------|
|           |            |        |                |       |       |               | WT vs DMP-777 | WT vs <i>H.felis</i> | WT vs L635 |
| 12442_at  | down in WT | 9.79   | 9.60           | 10.33 | 7.78  | Ccnb2         | 2.01          | 1.82                 | 2.55       |
| 21973_at  | down in WT | 9.52   | 9.68           | 10.49 | 7.57  | Top2a         | 1.95          | 2.11                 | 2.92       |
| 51944_at  | down in WT | 7.64   | 7.47           | 8.06  | 5.88  | D2ErtD750e    | 1.75          | 1.59                 | 2.18       |
| 67701_at  | down in WT | 8.48   | 9.99           | 8.36  | 6.86  | Wfdc2         | 1.62          | 3.12                 | 1.50       |
| 232983_at | down in WT | 9.82   | 9.87           | 10.12 | 8.31  | Cxcl17        | 1.50          | 1.56                 | 1.81       |
| 60411_at  | down in WT | 7.93   | 7.85           | 9.18  | 6.58  | Cenpk         | 1.35          | 1.27                 | 2.60       |
| 237886_at | down in WT | 7.01   | 7.01           | 7.85  | 5.68  | Slfn9         | 1.33          | 1.33                 | 2.18       |
| 12759_at  | down in WT | 12.42  | 12.76          | 12.96 | 11.38 | Clu           | 1.04          | 1.38                 | 1.58       |
| 53322_at  | up in WT   | 11.16  | 11.16          | 11.11 | 12.31 | Nucb2         | -1.15         | -1.16                | -1.20      |
| 70377_at  | up in WT   | 7.21   | 6.93           | 6.85  | 8.53  | Derl3         | -1.31         | -1.60                | -1.68      |
| 67080_at  | up in WT   | 6.25   | 5.90           | 6.38  | 7.62  | 1700019D03Rik | -1.37         | -1.73                | -1.25      |
| 15077_at  | up in WT   | 8.82   | 7.13           | 7.86  | 10.29 | Hist2h3c1     | -1.47         | -3.16                | -2.43      |
| 67475_at  | up in WT   | 7.80   | 7.44           | 7.51  | 9.28  | Ero1lb        | -1.48         | -1.84                | -1.77      |
| 192212_at | up in WT   | 6.85   | 5.96           | 7.44  | 8.36  | Prom2         | -1.51         | -2.41                | -0.93      |
| 16956_at  | up in WT   | 8.14   | 6.56           | 7.72  | 9.68  | Lpl           | -1.54         | -3.13                | -1.96      |
| 110695_at | up in WT   | 7.91   | 7.43           | 8.48  | 9.54  | Aldh7a1       | -1.63         | -2.12                | -1.07      |
| 14711_at  | up in WT   | 6.52   | 5.87           | 6.66  | 8.18  | Gnmt          | -1.66         | -2.31                | -1.51      |
| 54420_at  | up in WT   | 6.63   | 5.58           | 6.91  | 8.32  | Cldn8         | -1.69         | -2.74                | -1.41      |
| 17952_at  | up in WT   | 7.06   | 7.43           | 7.25  | 8.88  | Birc1f        | -1.82         | -1.45                | -1.63      |
| 209837_at | up in WT   | 6.11   | 5.85           | 6.18  | 7.94  | Slc38a5       | -1.83         | -2.09                | -1.76      |
| 66438_at  | up in WT   | 9.41   | 7.84           | 9.10  | 11.27 | Hamp2         | -1.86         | -3.43                | -2.17      |
| 66269_at  | up in WT   | 11.07  | 9.79           | 11.49 | 12.94 | Tmed6         | -1.87         | -3.14                | -1.45      |
| 12491_at  | up in WT   | 8.24   | 7.25           | 8.84  | 10.18 | Cd36          | -1.94         | -2.93                | -1.34      |
| 14397_at  | up in WT   | 5.55   | 4.64           | 6.20  | 8.04  | Gabra4        | -2.49         | -3.41                | -1.84      |
| 216188_at | up in WT   | 6.01   | 5.74           | 6.00  | 8.52  | Aldh1l2       | -2.51         | -2.78                | -2.51      |
| 14566_at  | up in WT   | 7.12   | 6.25           | 7.65  | 9.82  | Gdf9          | -2.69         | -3.57                | -2.17      |
| 68404_at  | up in WT   | 8.17   | 6.88           | 8.88  | 10.92 | Nrn1          | -2.75         | -4.04                | -2.04      |
| 102294_at | up in WT   | 8.15   | 8.64           | 8.75  | 10.90 | Cyp4v3        | -2.76         | -2.26                | -2.15      |
| 12144_at  | up in WT   | 7.24   | 6.57           | 8.12  | 10.70 | Blm           | -3.46         | -4.13                | -2.58      |
| 22074_at  | up in WT   | 4.39   | 3.55           | 5.83  | 8.58  | Try4          | -4.20         | -5.04                | -2.75      |
| 436522_at | up in WT   | 4.69   | 4.24           | 5.31  | 9.05  | Try10         | -4.36         | -4.81                | -3.75      |
