# Supplementary material
Source: PubMed Central journal article supplement (PMC3762676)
Supplement: NIHMS507646-supplement-Supp_Table_3.pdf [file NIHMS507646-supplement-Supp_Table_3.pdf]

**SPEM with inflammation**

**Fold Change**

| Probe     | Direction  | <i>H.felis</i> | L635  | WT_CC | Gene Symbol | WT vs          | WT vs |
|-----------|------------|----------------|-------|-------|-------------|----------------|-------|
|           |            |                |       |       |             | <i>H.felis</i> | L635  |
| 12638_at  | down in WT | 10.32          | 7.68  | 4.54  | Cftr        | 5.78           | 3.14  |
| 19695_at  | down in WT | 10.66          | 9.70  | 6.32  | Reg3g       | 4.33           | 3.38  |
| 12738_at  | down in WT | 9.08           | 7.14  | 5.58  | Cldn2       | 3.49           | 1.55  |
| 12505_at  | down in WT | 10.05          | 8.74  | 6.75  | Cd44        | 3.29           | 1.98  |
| 104156_at | down in WT | 10.02          | 8.90  | 6.90  | Etv5        | 3.13           | 2.01  |
| 67701_at  | down in WT | 9.99           | 8.36  | 6.86  | Wfdc2       | 3.12           | 1.50  |
| 14776_at  | down in WT | 11.81          | 11.16 | 8.80  | Gpx2        | 3.00           | 2.36  |
| 12945_at  | down in WT | 11.84          | 11.80 | 9.07  | Dmbt1       | 2.77           | 2.72  |
| 12475_at  | down in WT | 8.77           | 7.57  | 6.04  | Cd14        | 2.72           | 1.53  |
| 229323_at | down in WT | 8.44           | 8.16  | 6.26  | Gpr171      | 2.17           | 1.89  |
| 21897_at  | down in WT | 8.08           | 7.47  | 5.93  | Tlr1        | 2.15           | 1.54  |
| 75974_at  | down in WT | 9.84           | 8.58  | 7.69  | Dock11      | 2.15           | 0.89  |
| 21973_at  | down in WT | 9.68           | 10.49 | 7.57  | Top2a       | 2.11           | 2.92  |
| 56615_at  | down in WT | 9.90           | 8.98  | 7.79  | Mgst1       | 2.10           | 1.18  |
| 13040_at  | down in WT | 11.42          | 10.63 | 9.39  | Ctss        | 2.03           | 1.24  |
| 73656_at  | down in WT | 7.97           | 8.07  | 5.94  | Ms4a6c      | 2.03           | 2.13  |
| 17105_at  | down in WT | 9.45           | 10.01 | 7.48  | Lyz2        | 1.97           | 2.53  |
| 14841_at  | down in WT | 7.34           | 7.47  | 5.38  | Gsg2        | 1.95           | 2.08  |
| 17476_at  | down in WT | 9.59           | 8.88  | 7.74  | Mpeg1       | 1.85           | 1.14  |
| 12442_at  | down in WT | 9.60           | 10.33 | 7.78  | Ccnb2       | 1.82           | 2.55  |
| 27214_at  | down in WT | 8.79           | 8.72  | 6.99  | Dbf4        | 1.80           | 1.72  |
| 56150_at  | down in WT | 9.58           | 9.92  | 7.80  | Mad2l1      | 1.78           | 2.12  |
| 12523_at  | down in WT | 7.56           | 7.05  | 5.78  | Cd84        | 1.78           | 1.27  |
| 19255_at  | down in WT | 9.11           | 8.94  | 7.35  | Ptpn2       | 1.76           | 1.59  |
| 217946_at | down in WT | 7.51           | 7.25  | 5.82  | Cdca7l      | 1.70           | 1.43  |
| 16411_at  | down in WT | 7.20           | 6.75  | 5.51  | Itgax       | 1.69           | 1.23  |
| 21825_at  | down in WT | 8.92           | 8.85  | 7.28  | Thbs1       | 1.64           | 1.57  |
| 51944_at  | down in WT | 7.47           | 8.06  | 5.88  | D2Ertd750e  | 1.59           | 2.18  |
| 232983_at | down in WT | 9.87           | 10.12 | 8.31  | Cxcl17      | 1.56           | 1.81  |
| 20288_at  | down in WT | 7.86           | 7.96  | 6.31  | Msr1        | 1.55           | 1.66  |
| 15201_at  | down in WT | 8.03           | 9.58  | 6.56  | Hells       | 1.47           | 3.02  |
| 19126_at  | down in WT | 12.21          | 11.49 | 10.76 | Prom1       | 1.44           | 0.73  |
| 12260_at  | down in WT | 7.89           | 7.91  | 6.49  | C1qb        | 1.40           | 1.42  |
| 12759_at  | down in WT | 12.76          | 12.96 | 11.38 | Clu         | 1.38           | 1.58  |
| 68774_at  | down in WT | 6.92           | 7.27  | 5.56  | Ms4a6d      | 1.36           | 1.72  |
| 14127_at  | down in WT | 7.68           | 7.98  | 6.35  | Fcer1g      | 1.33           | 1.63  |
| 237886_at | down in WT | 7.01           | 7.85  | 5.68  | Slfn9       | 1.33           | 2.18  |
| 60411_at  | down in WT | 7.85           | 9.18  | 6.58  | Cenpk       | 1.27           | 2.60  |
| 17869_at  | down in WT | 9.45           | 10.33 | 8.21  | Myc         | 1.24           | 2.12  |
| 12527_at  | down in WT | 9.93           | 9.82  | 8.74  | Cd9         | 1.19           | 1.08  |
| 22177_at  | down in WT | 10.18          | 10.50 | 9.03  | Tyrobp      | 1.15           | 1.47  |
| 68533_at  | down in WT | 10.22          | 10.63 | 9.32  | Mphosph6    | 0.91           | 1.31  |
| 64138_at  | down in WT | 8.87           | 9.09  | 8.03  | Ctsz        | 0.84           | 1.06  |
| 216440_at | up in WT   | 9.40           | 8.80  | 10.18 | Os9         | -0.78          | -1.39 |

|           |          |       |       |       |               |       |       |
|-----------|----------|-------|-------|-------|---------------|-------|-------|
| 72333_at  | up in WT | 6.62  | 6.62  | 7.40  | Palld         | -0.79 | -0.79 |
| 20454_at  | up in WT | 6.83  | 6.56  | 7.63  | St3gal5       | -0.80 | -1.07 |
| 77975_at  | up in WT | 10.07 | 9.56  | 10.91 | Tmem50b       | -0.84 | -1.35 |
| 70028_at  | up in WT | 7.91  | 7.78  | 8.77  | Dopey2        | -0.86 | -0.99 |
| 66663_at  | up in WT | 8.83  | 8.91  | 9.73  | Uba5          | -0.90 | -0.83 |
| 218214_at | up in WT | 7.12  | 7.17  | 8.05  | Aof1          | -0.94 | -0.88 |
| 217337_at | up in WT | 9.33  | 9.33  | 10.28 | Srp68         | -0.95 | -0.95 |
| 107351_at | up in WT | 5.98  | 6.04  | 6.95  | Kank1         | -0.97 | -0.91 |
| 12036_at  | up in WT | 7.95  | 8.10  | 9.00  | Bcat2         | -1.05 | -0.91 |
| 66119_at  | up in WT | 9.34  | 9.32  | 10.44 | Tomm6         | -1.10 | -1.12 |
| 53322_at  | up in WT | 11.16 | 11.11 | 12.31 | Nucb2         | -1.16 | -1.20 |
| 18604_at  | up in WT | 8.01  | 7.86  | 9.17  | Pdk2          | -1.16 | -1.31 |
| 72039_at  | up in WT | 8.41  | 8.32  | 9.64  | Mccc1         | -1.23 | -1.32 |
| 67041_at  | up in WT | 9.85  | 10.12 | 11.24 | Oxct1         | -1.39 | -1.12 |
| 209027_at | up in WT | 6.20  | 6.15  | 7.61  | Pycr1         | -1.41 | -1.47 |
| 320718_at | up in WT | 9.12  | 8.50  | 10.54 | Slc26a9       | -1.42 | -2.04 |
| 108682_at | up in WT | 7.14  | 7.29  | 8.57  | Gpt2          | -1.44 | -1.28 |
| 17952_at  | up in WT | 7.43  | 7.25  | 8.88  | Birc1f        | -1.45 | -1.63 |
| 70377_at  | up in WT | 6.93  | 6.85  | 8.53  | Derl3         | -1.60 | -1.68 |
| 73647_at  | up in WT | 6.20  | 6.18  | 7.83  | Capn9         | -1.63 | -1.64 |
| 104776_at | up in WT | 8.77  | 9.09  | 10.41 | Aldh6a1       | -1.64 | -1.32 |
| 66885_at  | up in WT | 8.22  | 8.09  | 9.86  | Acadsb        | -1.65 | -1.78 |
| 67080_at  | up in WT | 5.90  | 6.38  | 7.62  | 1700019D03Rik | -1.73 | -1.25 |
| 16008_at  | up in WT | 6.40  | 6.93  | 8.18  | Igfbp2        | -1.78 | -1.25 |
| 67475_at  | up in WT | 7.44  | 7.51  | 9.28  | Ero1lb        | -1.84 | -1.77 |
| 11806_at  | up in WT | 10.36 | 10.63 | 12.29 | Apoa1         | -1.92 | -1.65 |
| 338521_at | up in WT | 8.62  | 9.13  | 10.55 | Fa2h          | -1.93 | -1.42 |
| 319229_at | up in WT | 6.78  | 7.64  | 8.74  | Sctr          | -1.96 | -1.10 |
| 209837_at | up in WT | 5.85  | 6.18  | 7.94  | Slc38a5       | -2.09 | -1.76 |
| 110695_at | up in WT | 7.43  | 8.48  | 9.54  | Aldh7a1       | -2.12 | -1.07 |
| 102294_at | up in WT | 8.64  | 8.75  | 10.90 | Cyp4v3        | -2.26 | -2.15 |
| 14711_at  | up in WT | 5.87  | 6.66  | 8.18  | Gnmt          | -2.31 | -1.51 |
| 192212_at | up in WT | 5.96  | 7.44  | 8.36  | Prom2         | -2.41 | -0.93 |
| 30956_at  | up in WT | 6.49  | 7.52  | 8.94  | Aass          | -2.44 | -1.42 |
| 54150_at  | up in WT | 6.91  | 6.78  | 9.37  | Rdh7          | -2.47 | -2.59 |
| 17341_at  | up in WT | 6.38  | 7.22  | 8.94  | Bhlha15       | -2.56 | -1.72 |
| 11829_at  | up in WT | 6.53  | 7.38  | 9.17  | Aqp4          | -2.64 | -1.79 |
| 54420_at  | up in WT | 5.58  | 6.91  | 8.32  | Cldn8         | -2.74 | -1.41 |
| 216188_at | up in WT | 5.74  | 6.00  | 8.52  | Aldh1l2       | -2.78 | -2.51 |
| 12577_at  | up in WT | 7.62  | 8.48  | 10.45 | Cdkn1c        | -2.83 | -1.97 |
| 12865_at  | up in WT | 9.30  | 9.86  | 12.22 | Cox7a1        | -2.92 | -2.36 |
| 12491_at  | up in WT | 7.25  | 8.84  | 10.18 | Cd36          | -2.93 | -1.34 |
| 16956_at  | up in WT | 6.56  | 7.72  | 9.68  | Lpl           | -3.13 | -1.96 |
| 66269_at  | up in WT | 9.79  | 11.49 | 12.94 | Tmed6         | -3.14 | -1.45 |
| 15077_at  | up in WT | 7.13  | 7.86  | 10.29 | Hist2h3c1     | -3.16 | -2.43 |
| 14397_at  | up in WT | 4.64  | 6.20  | 8.04  | Gabra4        | -3.41 | -1.84 |
| 66438_at  | up in WT | 7.84  | 9.10  | 11.27 | Hamp2         | -3.43 | -2.17 |

|           |          |      |       |       |        |       |       |
|-----------|----------|------|-------|-------|--------|-------|-------|
| 14566_at  | up in WT | 6.25 | 7.65  | 9.82  | Gdf9   | -3.57 | -2.17 |
| 16517_at  | up in WT | 7.64 | 8.61  | 11.29 | Kcnj16 | -3.65 | -2.68 |
| 68404_at  | up in WT | 6.88 | 8.88  | 10.92 | Nrn1   | -4.04 | -2.04 |
| 12144_at  | up in WT | 6.57 | 8.12  | 10.70 | Blm    | -4.13 | -2.58 |
| 69191_at  | up in WT | 8.38 | 10.68 | 13.01 | Pdia2  | -4.63 | -2.34 |
| 436522_at | up in WT | 4.24 | 5.31  | 9.05  | Try10  | -4.81 | -3.75 |
| 22074_at  | up in WT | 3.55 | 5.83  | 8.58  | Try4   | -5.04 | -2.75 |
