# Supplementary material
Source: PubMed Central journal article supplement (PMC3762676)
Supplement: NIHMS507646-supplement-Supp_Table_4.pdf [file NIHMS507646-supplement-Supp_Table_4.pdf]

**Inflammatory SPEM specific**

| Probe     | DIRECTION  | <i>H.felis</i> | L635  | DMP   | Gene Symbol | Fold Change               |                 |
|-----------|------------|----------------|-------|-------|-------------|---------------------------|-----------------|
|           |            |                |       |       |             | <i>H.felis</i> vs DMP-777 | L635 vs DMP-777 |
| 12475_at  | down in WT | 8.77           | 7.57  | 6.04  | Cd14        | 2.72                      | 1.53            |
| 229323_at | down in WT | 8.44           | 8.16  | 6.26  | Gpr171      | 2.17                      | 1.89            |
| 26366_at  | down in WT | 12.39          | 10.58 | 10.22 | Ceacam10    | 2.17                      | 0.36            |
| 73656_at  | down in WT | 7.97           | 8.07  | 5.94  | Ms4a6c      | 2.03                      | 2.13            |
| 17105_at  | down in WT | 9.45           | 10.01 | 7.48  | Lyz2        | 1.97                      | 2.53            |
| 69774_at  | down in WT | 8.80           | 8.31  | 6.86  | Ms4a6b      | 1.94                      | 1.45            |
| 110454_at | down in WT | 11.69          | 11.17 | 10.42 | Ly6a        | 1.26                      | 0.75            |
| 22177_at  | down in WT | 10.18          | 10.50 | 9.03  | Tyrobp      | 1.15                      | 1.47            |
| 73690_at  | down in WT | 7.89           | 8.03  | 7.05  | Glipr1      | 0.84                      | 0.98            |
| 216445_at | down in WT | 6.58           | 6.65  | 5.81  | Arhgap9     | 0.77                      | 0.84            |
| 13012_at  | up in WT   | 7.82           | 8.01  | 7.92  | Cst8        | -0.10                     | 0.09            |
| 100705_at | up in WT   | 6.87           | 6.91  | 7.48  | Acacb       | -0.61                     | -0.57           |
| 72333_at  | up in WT   | 6.62           | 6.62  | 7.40  | Palld       | -0.79                     | -0.79           |
| 20454_at  | up in WT   | 6.83           | 6.56  | 7.63  | St3gal5     | -0.80                     | -1.07           |
| 56072_at  | up in WT   | 7.19           | 7.35  | 8.03  | Lgals12     | -0.83                     | -0.67           |
| 77975_at  | up in WT   | 10.07          | 9.56  | 10.91 | Tmem50b     | -0.84                     | -1.35           |
| 242022_at | up in WT   | 5.97           | 6.28  | 6.92  | Frem2       | -0.95                     | -0.64           |
| 12389_at  | up in WT   | 7.90           | 7.94  | 8.95  | Cav1        | -1.05                     | -1.01           |
| 20535_at  | up in WT   | 7.57           | 7.80  | 8.79  | Slc4a2      | -1.22                     | -0.99           |
| 171168_at | up in WT   | 5.07           | 5.37  | 6.30  | Acer1       | -1.24                     | -0.93           |
| 320718_at | up in WT   | 9.12           | 8.50  | 10.54 | Slc26a9     | -1.42                     | -2.04           |
| 108682_at | up in WT   | 7.14           | 7.29  | 8.57  | Gpt2        | -1.44                     | -1.28           |
| 73647_at  | up in WT   | 6.20           | 6.18  | 7.83  | Capn9       | -1.63                     | -1.64           |
| 54150_at  | up in WT   | 6.91           | 6.78  | 9.37  | Rdh7        | -2.47                     | -2.59           |
| 11829_at  | up in WT   | 6.53           | 7.38  | 9.17  | Aqp4        | -2.64                     | -1.79           |
| 12865_at  | up in WT   | 9.30           | 9.86  | 12.22 | Cox7a1      | -2.92                     | -2.36           |
| 16517_at  | up in WT   | 7.64           | 8.61  | 11.29 | Kcnj16      | -3.65                     | -2.68           |
