# Supplementary material
Source: PubMed Central journal article supplement (PMC3762676)
Supplement: NIHMS507646-supplement-Supp_Table_5.pdf [file NIHMS507646-supplement-Supp_Table_5.pdf]

## Sheet1

## SPEM with chronic inflammation

## Fold Change

| Probe ID  | DIRECTION            | WT   | DMP- |      |                | Gene Symbol | Fold Change             |                              |                           |
|-----------|----------------------|------|------|------|----------------|-------------|-------------------------|------------------------------|---------------------------|
|           |                      |      | 777  | L635 | <i>H.felis</i> |             | WT vs<br><i>H.felis</i> | DMP-777<br>vs <i>H.felis</i> | L635 vs<br><i>H.felis</i> |
| 780960_at | up in <i>H.felis</i> | 5.26 | 5.05 | 4.23 | 10.59          | Gm10885     | 5.33                    | 5.54                         | 6.36                      |
| 404737_at | up in <i>H.felis</i> | 6.43 | 7.97 | 6.32 | 12.44          | Igl-J1      | 6.00                    | 4.47                         | 6.12                      |
| 629842_at | up in <i>H.felis</i> | 3.83 | 3.71 | 3.60 | 9.37           | Gm15449     | 5.54                    | 5.66                         | 5.77                      |
| 24108_at  | up in <i>H.felis</i> | 5.53 | 5.86 | 5.43 | 10.72          | Ubd         | 5.19                    | 4.86                         | 5.29                      |
| 16098_at  | up in <i>H.felis</i> | 4.39 | 4.66 | 4.28 | 9.52           | Igkv1-117   | 5.13                    | 4.86                         | 5.24                      |
| 16069_at  | up in <i>H.felis</i> | 7.13 | 6.98 | 6.12 | 11.16          | Igj         | 4.03                    | 4.18                         | 5.04                      |
| 243420_at | up in <i>H.felis</i> | 6.47 | 6.05 | 5.60 | 10.61          | Gm4964      | 4.14                    | 4.55                         | 5.01                      |
| 229927_at | up in <i>H.felis</i> | 5.28 | 5.32 | 4.83 | 9.72           | Clca4       | 4.43                    | 4.39                         | 4.89                      |
| 667865_at | up in <i>H.felis</i> | 5.30 | 5.76 | 4.91 | 9.71           | Igk-V19-17  | 4.41                    | 3.95                         | 4.80                      |
| 384514_at | up in <i>H.felis</i> | 4.25 | 5.43 | 4.13 | 8.91           | Gm1418      | 4.67                    | 3.49                         | 4.78                      |
| 108022_at | up in <i>H.felis</i> | 4.63 | 5.19 | 4.34 | 9.02           | Igk-V19-15  | 4.39                    | 3.83                         | 4.69                      |
| 225594_at | up in <i>H.felis</i> | 4.79 | 4.55 | 4.76 | 9.36           | Gm4841      | 4.57                    | 4.82                         | 4.60                      |
| 240327_at | up in <i>H.felis</i> | 6.99 | 6.46 | 6.19 | 10.70          | Gm4951      | 3.71                    | 4.24                         | 4.51                      |
| 15930_at  | up in <i>H.felis</i> | 5.39 | 5.34 | 4.93 | 9.37           | Ido1        | 3.98                    | 4.03                         | 4.45                      |
| 12502_at  | up in <i>H.felis</i> | 5.27 | 5.78 | 5.19 | 9.61           | Cd3g        | 4.34                    | 3.83                         | 4.42                      |
| 16142_at  | up in <i>H.felis</i> | 6.83 | 6.93 | 6.71 | 11.10          | Igl-V1      | 4.26                    | 4.17                         | 4.39                      |
| 15000_at  | up in <i>H.felis</i> | 6.84 | 6.49 | 6.18 | 10.55          | H2-DMb2     | 3.72                    | 4.07                         | 4.37                      |
| 14038_at  | up in <i>H.felis</i> | 5.47 | 5.59 | 6.13 | 10.48          | Expi        | 5.01                    | 4.89                         | 4.35                      |
| 16145_at  | up in <i>H.felis</i> | 7.79 | 8.83 | 7.52 | 11.85          | Igtp        | 4.06                    | 3.02                         | 4.33                      |
| 60440_at  | up in <i>H.felis</i> | 7.33 | 7.05 | 7.44 | 11.77          | Igip1       | 4.43                    | 4.71                         | 4.33                      |
| 12362_at  | up in <i>H.felis</i> | 6.00 | 5.66 | 5.79 | 10.11          | Casp1       | 4.10                    | 4.45                         | 4.32                      |
| 14938_at  | up in <i>H.felis</i> | 5.79 | 4.82 | 4.99 | 9.26           | Gzma        | 3.47                    | 4.45                         | 4.28                      |
| 14469_at  | up in <i>H.felis</i> | 6.76 | 7.18 | 6.09 | 10.35          | Gbp2        | 3.59                    | 3.17                         | 4.26                      |
| 110785_at | up in <i>H.felis</i> | 7.83 | 8.76 | 7.80 | 12.03          | Igl-C1      | 4.20                    | 3.27                         | 4.23                      |
| 17002_at  | up in <i>H.felis</i> | 5.10 | 5.05 | 4.76 | 8.79           | Ltf         | 3.69                    | 3.74                         | 4.03                      |
| 368204_at | up in <i>H.felis</i> | 5.34 | 5.38 | 6.50 | 10.40          | Khdc1a      | 5.06                    | 5.02                         | 3.90                      |
| 667597_at | up in <i>H.felis</i> | 4.34 | 4.08 | 3.95 | 7.75           | BC023105    | 3.41                    | 3.67                         | 3.80                      |
| 140474_at | up in <i>H.felis</i> | 6.13 | 6.54 | 6.10 | 9.88           | Muc4        | 3.74                    | 3.34                         | 3.77                      |
| 14998_at  | up in <i>H.felis</i> | 6.77 | 6.81 | 7.11 | 10.88          | H2-DMa      | 4.10                    | 4.07                         | 3.76                      |
| 110786_at | up in <i>H.felis</i> | 7.43 | 6.78 | 6.10 | 9.85           | Igl-C2      | 2.43                    | 3.07                         | 3.75                      |
| 15953_at  | up in <i>H.felis</i> | 7.63 | 7.98 | 7.43 | 11.16          | lfi47       | 3.53                    | 3.18                         | 3.72                      |
| 68891_at  | up in <i>H.felis</i> | 6.32 | 6.50 | 6.75 | 10.46          | Cd177       | 4.15                    | 3.96                         | 3.71                      |
| 59290_at  | up in <i>H.felis</i> | 7.51 | 7.70 | 6.84 | 10.44          | Gpa33       | 2.93                    | 2.74                         | 3.60                      |
| 17329_at  | up in <i>H.felis</i> | 6.48 | 6.53 | 6.76 | 10.33          | Cxcl9       | 3.86                    | 3.80                         | 3.57                      |
| 17472_at  | up in <i>H.felis</i> | 7.14 | 6.59 | 6.67 | 10.13          | Gbp4        | 2.99                    | 3.55                         | 3.46                      |
| 667550_at | up in <i>H.felis</i> | 6.43 | 6.22 | 6.88 | 10.35          | Gm8698      | 3.91                    | 4.13                         | 3.46                      |
| 80797_at  | up in <i>H.felis</i> | 6.10 | 6.94 | 5.71 | 9.13           | Clca2       | 3.03                    | 2.19                         | 3.41                      |
| 20210_at  | up in <i>H.felis</i> | 5.91 | 6.12 | 6.76 | 10.14          | Saa3        | 4.23                    | 4.02                         | 3.39                      |
| 16149_at  | up in <i>H.felis</i> | 8.17 | 8.04 | 8.37 | 11.75          | Cd74        | 3.58                    | 3.71                         | 3.39                      |
| 71724_at  | up in <i>H.felis</i> | 5.31 | 4.64 | 4.57 | 7.92           | Aox3        | 2.60                    | 3.27                         | 3.35                      |

Sheet1

|           |                      |       |       |       |       |               |      |      |      |
|-----------|----------------------|-------|-------|-------|-------|---------------|------|------|------|
| 692161_at | up in <i>H.felis</i> | 6.02  | 6.21  | 6.49  | 9.81  | Igkv19-93     | 3.79 | 3.60 | 3.32 |
| 192201_at | up in <i>H.felis</i> | 5.68  | 5.62  | 5.16  | 8.47  | Wfdc15b       | 2.79 | 2.85 | 3.31 |
| 631323_at | up in <i>H.felis</i> | 6.13  | 6.58  | 5.91  | 9.19  | Gm12250       | 3.06 | 2.61 | 3.28 |
| 18703_at  | up in <i>H.felis</i> | 7.27  | 9.35  | 9.48  | 12.64 | Pigr          | 5.37 | 3.29 | 3.16 |
| 76074_at  | up in <i>H.felis</i> | 7.22  | 7.05  | 7.84  | 11.00 | 5830443L24Rik | 3.78 | 3.95 | 3.16 |
| 242851_at | up in <i>H.felis</i> | 5.43  | 5.87  | 4.78  | 7.83  | Gnat3         | 2.41 | 1.97 | 3.06 |
| 15944_at  | up in <i>H.felis</i> | 6.78  | 7.39  | 6.99  | 9.99  | Irgm1         | 3.21 | 2.60 | 3.00 |
| 16398_at  | up in <i>H.felis</i> | 6.27  | 6.54  | 6.33  | 9.15  | Itga2         | 2.87 | 2.61 | 2.81 |
| 16912_at  | up in <i>H.felis</i> | 9.41  | 9.88  | 8.97  | 11.77 | Psmb9         | 2.37 | 1.89 | 2.80 |
| 110557_at | up in <i>H.felis</i> | 7.20  | 7.36  | 7.05  | 9.80  | H2-Q6         | 2.60 | 2.44 | 2.75 |
| 74424_at  | up in <i>H.felis</i> | 6.71  | 7.35  | 6.40  | 9.15  | Tmc5          | 2.44 | 1.80 | 2.75 |
| 14961_at  | up in <i>H.felis</i> | 9.55  | 9.18  | 9.79  | 12.53 | H2-Ab1        | 2.97 | 3.35 | 2.74 |
| 20304_at  | up in <i>H.felis</i> | 7.87  | 7.67  | 7.92  | 10.58 | Ccl5          | 2.70 | 2.91 | 2.66 |
| 55932_at  | up in <i>H.felis</i> | 6.32  | 6.39  | 5.64  | 8.29  | Gbp3          | 1.97 | 1.90 | 2.65 |
| 12638_at  | up in <i>H.felis</i> | 4.54  | 5.90  | 7.68  | 10.32 | Cftr          | 5.78 | 4.42 | 2.64 |
| 15040_at  | up in <i>H.felis</i> | 7.79  | 7.98  | 7.50  | 10.13 | H2-T23        | 2.34 | 2.15 | 2.63 |
| 20846_at  | up in <i>H.felis</i> | 8.15  | 8.66  | 8.08  | 10.70 | Stat1         | 2.55 | 2.04 | 2.62 |
| 14960_at  | up in <i>H.felis</i> | 9.43  | 9.19  | 9.77  | 12.38 | H2-Aa         | 2.95 | 3.19 | 2.61 |
| 22349_at  | up in <i>H.felis</i> | 7.14  | 7.47  | 7.13  | 9.73  | Vil1          | 2.59 | 2.26 | 2.60 |
| 12266_at  | up in <i>H.felis</i> | 8.84  | 9.04  | 8.93  | 11.50 | C3            | 2.67 | 2.46 | 2.57 |
| 258508_at | up in <i>H.felis</i> | 5.82  | 5.94  | 6.20  | 8.78  | Olfr99        | 2.96 | 2.83 | 2.57 |
| 20715_at  | up in <i>H.felis</i> | 5.41  | 5.55  | 5.56  | 8.09  | Serpina3g     | 2.68 | 2.54 | 2.54 |
| 15019_at  | up in <i>H.felis</i> | 5.95  | 5.18  | 6.23  | 8.58  | H2-Q8         | 2.63 | 3.40 | 2.35 |
| 235952_at | up in <i>H.felis</i> | 6.89  | 7.42  | 6.69  | 9.02  | Gm189         | 2.13 | 1.60 | 2.33 |
| 14067_at  | up in <i>H.felis</i> | 6.46  | 7.45  | 7.73  | 10.02 | F5            | 3.55 | 2.57 | 2.29 |
| 26365_at  | up in <i>H.felis</i> | 7.04  | 7.43  | 8.20  | 10.48 | Ceacam1       | 3.44 | 3.05 | 2.28 |
| 21354_at  | up in <i>H.felis</i> | 6.33  | 6.67  | 6.40  | 8.68  | Tap1          | 2.35 | 2.01 | 2.28 |
| 14969_at  | up in <i>H.felis</i> | 7.85  | 7.79  | 8.15  | 10.43 | H2-Eb1        | 2.58 | 2.64 | 2.28 |
| 16913_at  | up in <i>H.felis</i> | 7.28  | 7.57  | 7.70  | 9.95  | Psmb8         | 2.67 | 2.38 | 2.25 |
| 56045_at  | up in <i>H.felis</i> | 9.65  | 9.96  | 9.17  | 11.39 | Samhd1        | 1.75 | 1.43 | 2.22 |
| 245684_at | up in <i>H.felis</i> | 5.81  | 5.71  | 5.84  | 8.03  | Cnksr2        | 2.22 | 2.32 | 2.19 |
| 14999_at  | up in <i>H.felis</i> | 10.38 | 10.40 | 10.52 | 12.71 | H2-DMb1       | 2.33 | 2.31 | 2.18 |
| 15945_at  | up in <i>H.felis</i> | 6.12  | 6.08  | 6.24  | 8.41  | Cxcl10        | 2.29 | 2.33 | 2.17 |
| 12363_at  | up in <i>H.felis</i> | 6.51  | 6.47  | 7.40  | 9.57  | Casp4         | 3.06 | 3.10 | 2.17 |
| 14962_at  | up in <i>H.felis</i> | 7.45  | 8.08  | 7.62  | 9.77  | Cfb           | 2.32 | 1.69 | 2.16 |
| 320679_at | up in <i>H.felis</i> | 6.05  | 6.64  | 6.18  | 8.29  | Samd12        | 2.25 | 1.65 | 2.11 |
| 99633_at  | up in <i>H.felis</i> | 7.04  | 7.01  | 6.40  | 8.51  | Lphn2         | 1.47 | 1.50 | 2.11 |
| 12517_at  | up in <i>H.felis</i> | 6.19  | 6.39  | 5.85  | 7.93  | Cd72          | 1.74 | 1.54 | 2.08 |
| 12870_at  | up in <i>H.felis</i> | 6.01  | 6.05  | 6.40  | 8.47  | Cp            | 2.46 | 2.42 | 2.07 |
| 13058_at  | up in <i>H.felis</i> | 7.01  | 7.69  | 7.86  | 9.90  | Cybb          | 2.90 | 2.21 | 2.04 |
| 71893_at  | up in <i>H.felis</i> | 6.19  | 6.39  | 6.79  | 8.80  | Noxo1         | 2.61 | 2.41 | 2.01 |
| 16182_at  | up in <i>H.felis</i> | 6.01  | 7.43  | 7.10  | 9.10  | Il18r1        | 3.09 | 1.66 | 1.99 |
| 22375_at  | up in <i>H.felis</i> | 9.14  | 9.44  | 9.06  | 11.05 | Wars          | 1.90 | 1.60 | 1.99 |

Sheet1

|           |                      |       |       |       |       |          |      |      |      |
|-----------|----------------------|-------|-------|-------|-------|----------|------|------|------|
| 12774_at  | up in <i>H.felis</i> | 5.44  | 6.08  | 5.93  | 7.90  | Ccr5     | 2.46 | 1.82 | 1.97 |
| 16633_at  | up in <i>H.felis</i> | 5.57  | 5.64  | 5.98  | 7.93  | Klra2    | 2.36 | 2.29 | 1.94 |
| 12738_at  | up in <i>H.felis</i> | 5.58  | 5.96  | 7.14  | 9.08  | Cldn2    | 3.49 | 3.12 | 1.94 |
| 14964_at  | up in <i>H.felis</i> | 9.77  | 10.04 | 9.23  | 11.17 | H2-D1    | 1.40 | 1.13 | 1.94 |
| 668139_at | up in <i>H.felis</i> | 6.60  | 6.68  | 6.72  | 8.66  | Gm8995   | 2.05 | 1.98 | 1.94 |
| 236573_at | up in <i>H.felis</i> | 6.85  | 6.28  | 6.96  | 8.89  | BC057170 | 2.05 | 2.62 | 1.93 |
| 80901_at  | up in <i>H.felis</i> | 6.72  | 6.85  | 6.46  | 8.39  | Cxcr6    | 1.66 | 1.53 | 1.92 |
| 16362_at  | up in <i>H.felis</i> | 6.90  | 6.91  | 6.56  | 8.47  | Irf1     | 1.57 | 1.56 | 1.90 |
| 102084_at | up in <i>H.felis</i> | 6.00  | 6.28  | 6.08  | 7.97  | NA       | 1.98 | 1.69 | 1.89 |
| 17076_at  | up in <i>H.felis</i> | 6.14  | 6.38  | 6.40  | 8.26  | Ly75     | 2.12 | 1.89 | 1.86 |
| 21946_at  | up in <i>H.felis</i> | 9.40  | 9.40  | 9.70  | 11.54 | Pglyrp1  | 2.13 | 2.14 | 1.84 |
| 107526_at | up in <i>H.felis</i> | 7.13  | 6.62  | 6.67  | 8.49  | Gimap4   | 1.36 | 1.87 | 1.82 |
| 26366_at  | up in <i>H.felis</i> | 10.22 | 8.95  | 10.58 | 12.39 | Ceacam10 | 2.17 | 3.44 | 1.81 |
| 75345_at  | up in <i>H.felis</i> | 5.23  | 5.31  | 5.62  | 7.43  | Slamf7   | 2.21 | 2.12 | 1.81 |
| 12268_at  | up in <i>H.felis</i> | 6.50  | 6.76  | 6.81  | 8.60  | C4b      | 2.10 | 1.84 | 1.79 |
| 21838_at  | up in <i>H.felis</i> | 7.24  | 7.19  | 7.14  | 8.92  | Thy1     | 1.68 | 1.74 | 1.78 |
| 16186_at  | up in <i>H.felis</i> | 6.39  | 6.50  | 6.80  | 8.52  | Il2rg    | 2.13 | 2.02 | 1.72 |
| 12364_at  | up in <i>H.felis</i> | 6.29  | 6.03  | 5.77  | 7.47  | Casp12   | 1.18 | 1.44 | 1.70 |
| 75568_at  | up in <i>H.felis</i> | 6.32  | 6.87  | 8.69  | 8.78  | Capsl    | 2.45 | 1.91 | 1.68 |
| 18805_at  | up in <i>H.felis</i> | 7.69  | 13.38 | 7.62  | 9.27  | Pld1     | 1.58 | 1.08 | 1.65 |
| 14991_at  | up in <i>H.felis</i> | 7.23  | 7.27  | 7.24  | 8.88  | H2-M3    | 1.65 | 1.61 | 1.64 |
| 67701_at  | up in <i>H.felis</i> | 6.86  | 8.48  | 8.36  | 9.99  | Wfdc2    | 3.12 | 1.50 | 1.62 |
| 19264_at  | up in <i>H.felis</i> | 7.12  | 7.55  | 8.06  | 9.64  | Ptprc    | 2.52 | 2.09 | 1.59 |
| 219151_at | up in <i>H.felis</i> | 6.42  | 6.81  | 6.81  | 8.31  | Scara3   | 1.89 | 1.50 | 1.50 |
| 56434_at  | up in <i>H.felis</i> | 8.38  | 8.59  | 8.26  | 9.75  | Tspan3   | 1.37 | 1.16 | 1.49 |
| 108670_at | up in <i>H.felis</i> | 6.81  | 6.97  | 6.80  | 8.26  | Epsti1   | 1.45 | 1.29 | 1.46 |
| 210293_at | up in <i>H.felis</i> | 6.21  | 6.27  | 6.70  | 8.16  | Dock10   | 1.95 | 1.89 | 1.46 |
| 16407_at  | up in <i>H.felis</i> | 5.60  | 5.89  | 5.92  | 7.36  | Itgae    | 1.76 | 1.47 | 1.44 |
| 67092_at  | up in <i>H.felis</i> | 6.56  | 6.27  | 6.46  | 7.90  | Gatm     | 1.34 | 1.63 | 1.43 |
| 240725_at | up in <i>H.felis</i> | 6.85  | 6.62  | 6.64  | 8.08  | Sulf1    | 1.22 | 1.45 | 1.43 |
| 246256_at | up in <i>H.felis</i> | 5.32  | 5.59  | 5.83  | 7.25  | Fcgr4    | 1.92 | 1.65 | 1.42 |
| 69146_at  | up in <i>H.felis</i> | 7.10  | 7.43  | 7.36  | 8.74  | Gsdmd    | 1.64 | 1.31 | 1.38 |
| 77522_at  | up in <i>H.felis</i> | 7.87  | 8.04  | 7.90  | 9.26  | Tmem213  | 1.39 | 1.22 | 1.36 |
| 101202_at | up in <i>H.felis</i> | 6.10  | 6.14  | 6.18  | 7.48  | Hepacam2 | 1.38 | 1.34 | 1.29 |
| 207474_at | up in <i>H.felis</i> | 6.12  | 6.04  | 5.96  | 7.25  | Kctd12b  | 1.13 | 1.21 | 1.29 |
| 12259_at  | up in <i>H.felis</i> | 7.02  | 7.51  | 7.38  | 8.66  | C1qa     | 1.65 | 1.15 | 1.28 |
| 16401_at  | up in <i>H.felis</i> | 6.58  | 6.81  | 6.82  | 8.09  | Itga4    | 1.51 | 1.28 | 1.27 |
| 75974_at  | up in <i>H.felis</i> | 7.69  | 8.38  | 8.58  | 9.84  | Dock11   | 2.15 | 1.46 | 1.25 |
| 16792_at  | up in <i>H.felis</i> | 7.34  | 7.89  | 7.93  | 9.16  | Laptm5   | 1.82 | 1.27 | 1.23 |
| 212167_at | up in <i>H.felis</i> | 6.26  | 6.56  | 6.72  | 7.95  | Pion     | 1.68 | 1.39 | 1.23 |
| 80898_at  | up in <i>H.felis</i> | 7.66  | 7.49  | 7.86  | 9.08  | Erap1    | 1.42 | 1.59 | 1.22 |
| 12475_at  | up in <i>H.felis</i> | 6.04  | 6.22  | 7.57  | 8.77  | Cd14     | 2.72 | 2.54 | 1.20 |
| 15277_at  | up in <i>H.felis</i> | 6.40  | 6.62  | 6.53  | 7.67  | Hk2      | 1.28 | 1.06 | 1.14 |

Sheet1

|           |                        |       |       |       |       |               |       |       |       |
|-----------|------------------------|-------|-------|-------|-------|---------------|-------|-------|-------|
| 213233_at | up in <i>H.felis</i>   | 6.78  | 6.62  | 7.68  | 7.95  | Tapbpl        | 1.18  | 1.33  | 1.13  |
| 12767_at  | up in <i>H.felis</i>   | 8.28  | 8.39  | 8.57  | 9.67  | Cxcr4         | 1.39  | 1.27  | 1.10  |
| 54445_at  | up in <i>H.felis</i>   | 6.03  | 6.08  | 6.43  | 7.44  | Unc93b1       | 1.41  | 1.36  | 1.00  |
| 16205_at  | up in <i>H.felis</i>   | 6.12  | 5.76  | 6.01  | 6.96  | Gimap1        | 0.84  | 1.20  | 0.95  |
| 19126_at  | up in <i>H.felis</i>   | 10.76 | 8.18  | 11.49 | 12.21 | Prom1         | 1.44  | 1.07  | 0.71  |
| 74430_at  | down in <i>H.felis</i> | 8.52  | 7.66  | 7.82  | 6.87  | 4930452B06Rik | -1.65 | -0.80 | -0.95 |
| 66270_at  | down in <i>H.felis</i> | 8.82  | 8.24  | 8.23  | 7.09  | Fam134b       | -1.74 | -1.15 | -1.14 |
| 66438_at  | down in <i>H.felis</i> | 11.27 | 9.41  | 9.10  | 7.84  | Hamp2         | -3.43 | -1.57 | -1.26 |
| 192212_at | down in <i>H.felis</i> | 8.36  | 6.85  | 7.44  | 5.96  | Prom2         | -2.41 | -0.90 | -1.48 |
| 18778_at  | down in <i>H.felis</i> | 13.73 | 13.38 | 13.63 | 12.15 | Pla2g1b       | -1.58 | -1.24 | -1.48 |
| 66269_at  | down in <i>H.felis</i> | 12.94 | 11.07 | 11.49 | 9.79  | Tmed6         | -3.14 | -1.28 | -1.70 |
| 12955_at  | down in <i>H.felis</i> | 9.20  | 8.68  | 9.31  | 7.20  | Cryab         | -1.99 | -1.47 | -2.11 |
| 18947_at  | down in <i>H.felis</i> | 12.42 | 12.07 | 11.15 | 8.96  | Pnliprp2      | -3.47 | -3.11 | -2.19 |
| 14570_at  | down in <i>H.felis</i> | 9.42  | 9.03  | 9.27  | 6.97  | Arhgdig       | -2.45 | -2.06 | -2.30 |
| 545677_at | down in <i>H.felis</i> | 12.37 | 9.29  | 10.35 | 5.77  | Gm12888       | -6.60 | -3.52 | -4.58 |
| 81600_at  | down in <i>H.felis</i> | 13.65 | 12.18 | 13.28 | 7.39  | Chia          | -6.25 | -4.79 | -5.88 |
